# Supplementary material for: Prevalence of Mental Illnesses in U.S. State Prisons: A Systematic Review
Source: Atypon-hosted journal article supplement (doi:10.1176/appi.ps.201300166), 2014-04-01
Supplement: 862_ds001.pdf [file 862_ds001.pdf]

## Supplemental data for “The Prevalence of Mental Illnesses in U.S. State Prisons: A Systematic Review”

## Key differences between jails and prisons

|                                                 | Jail                                                  | Prison                                                                          |
|-------------------------------------------------|-------------------------------------------------------|---------------------------------------------------------------------------------|
| <b>Average daily population</b>                 | 750,000                                               | 1,600,000                                                                       |
| <b>Admissions per year</b>                      | 13,000,000                                            | 700,000                                                                         |
| <b>Jurisdiction</b>                             | County or City                                        | State or Federal                                                                |
| <b>Weekly turnover rate/average time served</b> | 65%                                                   | 2.1 years                                                                       |
| <b>Adjudication status</b>                      | Convicted: 38.9%<br>Unconvicted: 61.1%                | 96% sentenced to more than one year                                             |
| <b>Charges</b>                                  | For convicted, misdemeanors/other sentences<br><1year | Felonies<br>(state: violent, property; federal: drugs,<br>weapons, immigration) |
| <b>Demographics</b>                             | 37.8% Black, 15.8% Latino, 87% male                   | 37% Black, 34% Latino, 93% male                                                 |

Sources: Guerino P, Harrison PM, Sabol WJ. *Prisoners in 2010*. Washington DC; 2011; Minton TD. *Jail Inmates at Midyear 2010 - Statistical Tables*. Washington DC; 2011

**Supplemental Expanded Tables for “The Prevalence of Mental Illnesses in U.S. State Prisons: A Systematic Review”**

Supplemental Table 1. Expanded prevalence estimates of psychiatric disability/mental health problems and key study characteristics from 4 reviewed studies

| Ref                   | State | Facility type                    | Prison sample           | Study N | % of facility N | Ascertainment                                         | Current/Lifetime | Significant psychiatric disability | Severe psychiatric disability | Mental health issue | Major depression | Ever prescribed psychotropic medication | Lifetime hospitalized for mental health problems | Generalized anxiety |
|-----------------------|-------|----------------------------------|-------------------------|---------|-----------------|-------------------------------------------------------|------------------|------------------------------------|-------------------------------|---------------------|------------------|-----------------------------------------|--------------------------------------------------|---------------------|
| Dvoskin, 1989 [25]    | NY    | State prisons                    | General                 | 3684    | 9.4             | Survey of correctional health and mental health staff | C                | 10                                 | 5                             |                     |                  |                                         |                                                  |                     |
| Haugebrook, 2010 [26] | NJ    | State prisons                    | Adults age 55 and above | 114     | 12 <sup>a</sup> | Case records                                          | NR               |                                    |                               | 36                  |                  |                                         |                                                  |                     |
| Staton, 2003 [27]     | KY    | Correctional Institute for Women | Women                   | 60      | NR              | ASI                                                   | L                |                                    |                               |                     | 61.7             | 40                                      |                                                  | 53.3                |
| Tripodi, 2013 [28]    | NC    | Two state prisons                | Women                   | 125     | 8.3             | ASI                                                   | L                |                                    |                               |                     |                  |                                         | 27.6                                             |                     |

<sup>a</sup> Percentage of population aged 55 and above  
ASI: Addiction Severity Index.

Supplemental Table 2. Expanded prevalence estimates of psychiatric disorder diagnoses and key study characteristics from 17 reviewed studies.

| Ref                           | State | Facility type                     | Prison sample | Study N | % of facility N | Ascertainment                                   | Nosology  | Current/Lifetime | ADHD | Adjustment disorders | Affective disorders | Agoraphobia | Bipolar | Dysthymia | Generalized anxiety | Hypomania | Major depression | Mania | Mental disorders | OCD | Panic | Psychotic | PTSD | Schizoaffective | Schizophrenia | Schizophrenia or other psychotic | Social phobia | Specific phobia |     |     |
|-------------------------------|-------|-----------------------------------|---------------|---------|-----------------|-------------------------------------------------|-----------|------------------|------|----------------------|---------------------|-------------|---------|-----------|---------------------|-----------|------------------|-------|------------------|-----|-------|-----------|------|-----------------|---------------|----------------------------------|---------------|-----------------|-----|-----|
| Baillargeon, 2000 [29]        | TX    | State prisons                     | General       | 170,215 | 100             | Physician or mid-level practitioner examination | ICD-10    | C                |      |                      | 3.9                 |             |         |           |                     |           |                  |       | 10.8             |     |       |           |      |                 | 2             |                                  |               |                 |     |     |
|                               |       |                                   | Men           | 155,949 | 91.6            |                                                 |           | C                |      |                      | 3.3                 |             |         |           |                     |           |                  |       |                  |     | 10    |           |      |                 |               |                                  |               | 1.9             |     |     |
|                               |       |                                   | Women         | 14,268  | 8.4             |                                                 |           | C                |      |                      | 10.2                |             |         |           |                     |           |                  |       |                  |     |       | 19.8      |      |                 |               |                                  |               |                 | 2.7 |     |
| Birecree, 1994 [30]           | OR    | State prisons                     | Women         | 91      | 50              | MMPI, Clinical interview                        | DSM-III-R | C                |      | 22                   |                     |             |         | 6         | 1                   |           | 29               |       |                  |     |       |           |      | 10              |               |                                  |               |                 |     |     |
| Black, 2004 [31]              | IA    | Medical and Classification Center | General       | 67      | NR              | MINI-Plus                                       | DSM-IV    | C                | 10   |                      |                     | 16          |         | 12        | 4                   | 3         | 28               | 4     |                  |     |       | 12        | 10   | 6               | 3             |                                  | 6             | 4               |     |     |
| Blitz, 2005 [32] <sup>†</sup> | NJ    | State prisons                     | General       | 17,967  | 100             | Corrections records                             | NR        | C                |      |                      |                     |             |         | 3.6       |                     |           |                  |       |                  |     |       |           |      |                 |               |                                  |               |                 | .52 |     |
|                               |       |                                   | Men           | 16,700  | 100             |                                                 |           | C                |      |                      |                     |             |         |           |                     |           | 3.4              |       |                  |     |       |           |      |                 |               |                                  |               |                 |     | .46 |
|                               |       |                                   | Women         | 1,267   | 100             |                                                 |           | C                |      |                      |                     |             |         |           |                     |           | 6.7              |       |                  |     |       |           |      |                 |               |                                  |               |                 |     |     |
| Cahill, 2012 [33]             | CO    | State prisons                     | General       | 3962    | NA              | Coolidge Correctional Inventory                 | DSM-IV-TR | C                | 10.5 |                      |                     |             |         |           |                     |           |                  |       |                  |     |       |           |      |                 |               |                                  |               |                 |     |     |

| Ref                  | State | Facility type                     | Prison sample      | Study N | % of facility N | Ascertainment                              | Nosology  | Current/Lifetime | ADHD | Adjustment disorders | Affective disorders | Agoraphobia | Bipolar | Dysthymia | Generalized anxiety | Hypomania | Major depression | Mania | Mental disorders | OCD | Panic | Psychotic | PTSD | Schizoaffective | Schizophrenia | Schizophrenia or other psychotic | Social phobia | Specific phobia |  |
|----------------------|-------|-----------------------------------|--------------------|---------|-----------------|--------------------------------------------|-----------|------------------|------|----------------------|---------------------|-------------|---------|-----------|---------------------|-----------|------------------|-------|------------------|-----|-------|-----------|------|-----------------|---------------|----------------------------------|---------------|-----------------|--|
|                      |       |                                   | Men                | 3439    |                 |                                            |           | C                | 9.8  |                      |                     |             |         |           |                     |           |                  |       |                  |     |       |           |      |                 |               |                                  |               |                 |  |
|                      |       |                                   | Women              | 523     |                 |                                            |           | C                | 15.1 |                      |                     |             |         |           |                     |           |                  |       |                  |     |       |           |      |                 |               |                                  |               |                 |  |
| Collins, 1990 [35]*  | NC    | State prisons                     | Male felons        | 1140    | NR              | DIS plus additional PTSD measures          | DSM-III   | L                |      |                      |                     |             |         |           |                     |           |                  |       |                  |     |       | 2.3       |      |                 |               |                                  |               |                 |  |
| Collins, 1990 [36]*  | NC    | State prisons                     | Male felons        | 1140    | NR              | DIS                                        | DSM-III   | L                |      |                      |                     |             |         |           | 3.4                 |           | 3                |       |                  |     |       |           |      |                 |               |                                  |               |                 |  |
| Daniel, 2005 [37]    | MO    | State prisons                     | Suicide attempters | 112     | NA              | Corrections records                        | DSM-IV    | C                |      |                      |                     |             | 16.1    |           |                     |           | 26.8             |       |                  |     |       |           |      |                 |               |                                  |               |                 |  |
| DiCataldo, 1995 [38] | MA    | Maximum security prison           | General            | 514     | 89.3            | Modified RDS                               | DSM-III   | C                |      |                      |                     |             | 5.5     |           |                     |           | 9                |       |                  |     |       |           |      |                 | 6.5           |                                  |               |                 |  |
| Eyestone, 1994 [39]  | UT    | State Prison                      | Men                | 102     | NR              | BDI, HRS, four measures for childhood ADHD | DSM-III-R | C                | 25.5 |                      |                     |             |         |           |                     |           | 25.5             |       |                  |     |       |           |      |                 |               |                                  |               |                 |  |
| Gunter, 2008 [40]    | IA    | Medical and Classification Center | General            | 320     | NR              | MINI-Plus                                  | DSM-IV    | C                | 21.7 |                      | 16.6                | 22.5        | 1.5     | 19.1      |                     | 16.3      |                  |       | 9.7              | 4.4 |       | 12.5      |      | 3.7             |               | 10.4                             | 4.7           |                 |  |
|                      |       |                                   | Men                | 264     | NR              |                                            |           | C                | 23.1 |                      | 16.7                | 22          | 1.1     | 18.2      |                     | 16.7      |                  |       | 10.2             | 4.9 |       | 10.2      |      | 3               |               | 9.9                              | 3.8           |                 |  |
|                      |       |                                   | Women              | 56      | NR              |                                            |           | C                | 14.3 |                      | 16.1                | 25          | 3.6     | 23.2      |                     | 14.3      |                  |       | 7.1              | 1.8 |       | 23.2      |      | 7.1             |               | 12.3                             | 8.9           |                 |  |

| Ref                           | State | Facility type                      | Prison sample      | Study N | % of facility N   | Ascertainment                                                | Nosology  | Current/Lifetime | ADHD | Adjustment disorders | Affective disorders | Agoraphobia | Bipolar | Dysthymia | Generalized anxiety | Hypomania | Major depression | Mania | Mental disorders | OCD | Panic | Psychotic | PTSD | Schizoaffective | Schizophrenia | Schizophrenia or other psychotic | Social phobia | Specific phobia |
|-------------------------------|-------|------------------------------------|--------------------|---------|-------------------|--------------------------------------------------------------|-----------|------------------|------|----------------------|---------------------|-------------|---------|-----------|---------------------|-----------|------------------|-------|------------------|-----|-------|-----------|------|-----------------|---------------|----------------------------------|---------------|-----------------|
| Hutton, 2001 [41]             | MD    | Correctional Institution for Women | Women              | 177     | 22                | SCID                                                         | DSM-IV    | C                |      |                      |                     |             |         | 8         |                     |           | 10               |       |                  |     |       | 15        |      |                 |               |                                  |               |                 |
| Jordan, 1996 [42]             | NC    | Correctional Center for Women      | Female felons      | 805     | 100               | CIDI, clinical re-interview                                  | DSM-III-R | C                |      |                      |                     |             |         |           | 1.4                 |           | 10.8             |       |                  |     | 4.7   |           |      |                 |               |                                  |               |                 |
| Lewis, 2005 [43]              | CT    | York Correctional Institute        | HIV-positive women | 81      | 73.3 <sup>a</sup> | SCID                                                         | DSM-IV    | L                |      |                      |                     |             | 3.7     | 1.2       |                     | 48.1      |                  |       | 3.7              | 6.2 |       |           | 1.2  | 1.2             |               |                                  |               |                 |
| Powell, 1997 [44]             | NE    | State prisons                      | Men                | 118     | 13                | DIS                                                          | DSM-III-R | C                |      |                      |                     |             | 6.8     | 6.8       | 5.1                 |           | 11.9             | 5.1   |                  |     | 5.1   | 27.1      | 9.3  | 3.4             |               |                                  |               |                 |
| Wolff, 2005 [46] <sup>†</sup> | NJ    | State prisons                      | Men                | 16,700  | 100               | Corrections records                                          | NR        | C                |      |                      |                     |             |         |           |                     |           |                  |       |                  |     |       |           |      |                 |               |                                  | 4.3           |                 |
| Zlotnick, 1997 [47]           | RI    | Correctional Institution for Women | Women              | 85      | NR                | SCID, Clinician-Administered Assessment Interview for Adults | DSM-IV    | C                |      |                      |                     |             |         |           |                     |           |                  |       |                  |     |       | 48.2      |      |                 |               |                                  |               |                 |

a. Percentage of HIV-positive women

\* † Same sample, different articles

Abbreviations: ADHD: Attention Deficit Hyperactive Disorder. ASI: Addiction Severity Index. BDI: Beck Depression Inventory. CES-D: Center for Epidemiologic Studies Depression Scale. CIDI: Composite International Diagnostic Interview. DIS: Diagnostic Interview Schedule. DSM: Diagnostic and Statistical Manual of Mental Disorders. HRS: Hamilton Psychiatric Rating Scale of Depression. ICD-10: International Classification of Disease. MCMI-III: Millon Clinical Multiaxial Inventory-III. MINI-Plus: Mini Neuropsychiatric Interview-Plus. MMPI: Minnesota Multiphasic Personality Inventory. NR: Not reported. NA: Not applicable. OCD: Obsessive compulsive disorder. PTSD: Posttraumatic Stress Disorder. RDS: Referral Decision Scale. SCID: Structured Clinical Interview for DSM Disorders. STAI-S: Spielberger State Anxiety Inventory.

Supplemental Table 3. Expanded prevalence estimates of psychiatric disorder groupings and key study characteristics from 5 reviewed studies.

| Ref                 | State | Facility type | Prison sample      | Study N | % of facility N | Ascertainment                             | Nosology | Current/Lifetime | Schizophrenia, psychotic disorder, delusional disorder, and dementia | Major depression, major mood disorder, depression, and dysthymia: | OCD, anxiety disorder, panic disorder, phobia, and adjustment disorders | Schizophrenia, other psychoses, depressive disorders, and bipolar spectrum disorders | Major depression, major mood disorder, bipolar disorder | Depression, dysthymia, obsessive compulsive disorder, PTSD | Panic disorder, anxiety disorder, somatoform disorders, impulse control disorders, or ADD/ADHD | "Serious Mental Illnesses?" | At least one disorder | Multiple diagnoses |  |
|---------------------|-------|---------------|--------------------|---------|-----------------|-------------------------------------------|----------|------------------|----------------------------------------------------------------------|-------------------------------------------------------------------|-------------------------------------------------------------------------|--------------------------------------------------------------------------------------|---------------------------------------------------------|------------------------------------------------------------|------------------------------------------------------------------------------------------------|-----------------------------|-----------------------|--------------------|--|
| Blitz, 2005 [32]†   | NJ    | State prisons | General            | 17,967  | 100             | Corrections records                       | NR       | C                | 4.5                                                                  | 6.3                                                               | 2.6                                                                     |                                                                                      |                                                         |                                                            |                                                                                                |                             |                       |                    |  |
|                     |       |               | Men                | 16,700  | 100             |                                           | C        | 4.5              | 2.3                                                                  |                                                                   |                                                                         |                                                                                      |                                                         |                                                            |                                                                                                |                             |                       |                    |  |
|                     |       |               | Women              | 1,267   | 100             |                                           | C        | 4.5              | 18.5                                                                 | 6.2                                                               |                                                                         |                                                                                      |                                                         |                                                            |                                                                                                |                             |                       |                    |  |
| Caverley, 2006 [34] | UT    | State prison  | General            | 5700    | 100             | Psychiatric records, Symptom Checklist-90 | NR       | NR               |                                                                      |                                                                   |                                                                         | 15.5                                                                                 |                                                         |                                                            |                                                                                                |                             |                       |                    |  |
| Daniel, 2005 [37]   | MO    | State prisons | Suicide attempters | 112     | NA              | Corrections records                       | DSM-IV   | C                |                                                                      |                                                                   |                                                                         |                                                                                      |                                                         |                                                            |                                                                                                |                             | 78.6                  | 43.8               |  |
| Way, 2008 [45]      | NY    | State prisons | General            | 2918    | NR              | Medical records and clinician diagnosis   | NA       | C                |                                                                      |                                                                   |                                                                         |                                                                                      |                                                         |                                                            |                                                                                                | 6                           |                       |                    |  |
| Wolff, 2005 [46]†   | NJ    | State prisons | Men                | 16,700  | 100             | Corrections records                       | NR       | C                |                                                                      |                                                                   |                                                                         |                                                                                      | 6.7                                                     | 2.7                                                        | 2.1                                                                                            | 10.9                        |                       |                    |  |

† Same sample, different articles

Abbreviations: DSM: Diagnostic and Statistical Manual of Mental Disorders. NR: Not reported. NA: Not applicable. OCD: Obsessive compulsive disorder. PTSD: Posttraumatic Stress Disorder.

Supplemental Table 4. Expanded prevalence estimates of psychiatric symptoms and key study characteristics from 5 reviewed studies.

| Ref                | State | Facility type                      | Prison sample              | Study N | % of facility N | Ascertainment                  | Nosology  | Current/Lifetime | Major depression | Generalized anxiety | PTSD | Dysthymia | Bipolar | Moderate depression | Moderate to severe depression | Severe depression | Emotional/mental problems | Clinically relevant anxiety | Clinically relevant depression | Somatiform | Thought disorder | Delusional disorder |   |
|--------------------|-------|------------------------------------|----------------------------|---------|-----------------|--------------------------------|-----------|------------------|------------------|---------------------|------|-----------|---------|---------------------|-------------------------------|-------------------|---------------------------|-----------------------------|--------------------------------|------------|------------------|---------------------|---|
| Boothby, 1999 [48] | NC    | State prisons                      | General                    | 1494    | NR              | BDI                            | DSM-IV    | C                |                  |                     |      |           |         | 22                  | 5                             |                   |                           |                             |                                |            |                  |                     |   |
| Conklin, [49]      | MA    | Hampden County Correctional Center | General                    | 1198    | 67              | Comprehensive health interview | NA        | NR               |                  |                     |      |           |         |                     |                               |                   | 20                        |                             |                                |            |                  |                     |   |
|                    |       |                                    |                            |         |                 |                                |           |                  |                  |                     |      |           |         |                     |                               |                   | 53                        |                             |                                |            |                  |                     |   |
| Fogel, 1992 [50]   | NC    | Correctional Center for Women      | Women                      | 46      | NR              | STAI-S, CES-D/                 | NA/DSM-IV | C                |                  |                     |      |           |         |                     |                               |                   |                           | 57                          | 67                             |            |                  |                     |   |
| O'Keefe, 2008 [51] | CO    | State prisons                      | General                    | 9176    | NR              | MCMII-III                      | DSM-IV    | C                | 5                | 35                  | 8    | 17        | 4       |                     |                               |                   |                           |                             |                                |            | 2                | 3                   | 4 |
|                    |       |                                    | Administrative segregation |         |                 |                                |           | C                | 5                | 36                  | 9    | 17        | 4       |                     |                               |                   |                           |                             |                                |            | 1                | 4                   | 7 |
| Rowell, 2011 [52]  | NR    | Maximum security male prison       | Black men                  | 134     | NR              | BDI                            | DSM-IV    | C                |                  |                     |      |           |         | 29                  | 11                            | 2                 |                           |                             |                                |            |                  |                     |   |

Abbreviations: BDI: Beck Depression Inventory. CES-D: Center for Epidemiologic Studies Depression Scale. DSM: Diagnostic and Statistical Manual of Mental Disorders. MCMII-III: Millon Clinical Multiaxial Inventory-III.. NR: Not reported. NA: Not applicable. PTSD: Posttraumatic Stress Disorder. STAI-S: Spielberger State Anxiety Inventor
